# Supplementary material
Source: PubMed Central journal article supplement (PMC3495820)

## **Supplemental Material to:**

**Pauline C. Conroy, Chiara Saladino, Tiago J. Dantas, Pierce Lalor, Peter Dockery and Ciaran G. Morrison**

**C-NAP1 and rootletin restrain DNA damage-induced centriole splitting and facilitate ciliogenesis**

**2012; 11(20)**

**<http://dx.doi.org/10.4161/cc.21986>**

**<http://www.landesbioscience.com/journals/cc/article/21986>**

## **Supplemental Figure Legends**

### **Supplemental figure 1. Composition of split centrioles following IR**

Immunofluorescence microscopy analysis of untreated and IR-split centrioles.

hTERT-RPE1 cells were fixed 48 hours after 5 Gy IR, where indicated, then stained with the indicated antibodies (green) and  $\gamma$ -tubulin (red). Cells were counterstained with DAPI to visualise the DNA. Inserts show blow-ups of centrioles. Scale bar, 10  $\mu$ m.

### **Supplemental figure 2. Comparison of different siRNA and culture conditions**

**A.** Immunoblot analysis of RNAi efficiency. Cells were treated with 50nM siRNA for the indicated times.  $\alpha$ -tubulin was used as a loading control.

**B.** Ciliogenesis in RPE1 cells that had been siRNA treated for 48 hours before being serum starved in medium containing 0.2% NCS for 48 hours, then fixed and stained for acetylated tubulin and  $\gamma$ -tubulin. Data show the mean  $\pm$  s.e.m of 3 separate experiments in which at least 100 cells were counted. \*\*\* $P \leq 0.001$  compared with scrambled siRNA control.

**C.** Ciliogenesis in RPE1 cells that had been siRNA treated for 48 hours before being serum starved in serum-free medium (SFM) for 48 hours, then fixed and stained for acetylated tubulin and  $\gamma$ -tubulin. Data show the mean  $\pm$  s.e.m of 3 separate experiments in which at least 100 cells were counted. \*  $P \leq 0.05$  compared with scrambled siRNA control.

## Supplemental Tables

### Supplemental Table 1: Dharmacon On-target smart pool siRNA sequences used in this study

#### *NEK2*

CGAUCUGGCUAGUGUAAUU  
GCAGACAGAUCCUGGGCAU  
GGCAAUACUUAGAUGAAGA  
GCUAGAAUAUUAACCAUG

#### *CEP250*

GAGCAGAGCUACAGCGAAU  
GGACCUCGCUGAACAAUA  
AAGCUGACGUGGUGAAUAA  
GAGAAUAUGAUCCAAGAGA

#### *CROCC*

AGGCAGAGAGCGAGCGCAU  
GCGAGCAGGUGCAGACGUU  
GGGAGAUUGUCACCCGCAA  
CAGCGACUCCAGCGUGAAA

#### *KIZUNA*

UGUCCAAGCUCAUGUCGUA  
GAGAAUACUGACACGGGA  
CCAAGAAUAUUUAAAGCGA  
GAAUAUUGGCAGCGGUGCA

#### *CHK1*

CAAGAUGUGUGGUACUUUA  
GAGAAGGCAAUAUCCAAUA  
CCACAUGUCCUGAUCAUAU  
GAAGUUGGGCUAUCAAUGG

### Supplemental Table 2: Qiagen custom siRNA target sequences used in this study

#### *CEP250*

CUGGAAGAGCGUCU AACUGAU

#### *CROCC*

(AA)AAGCCAGUCUAGACAAGGA

#### *CEP164*

CAGGUGACAUUUACUAUUUCA

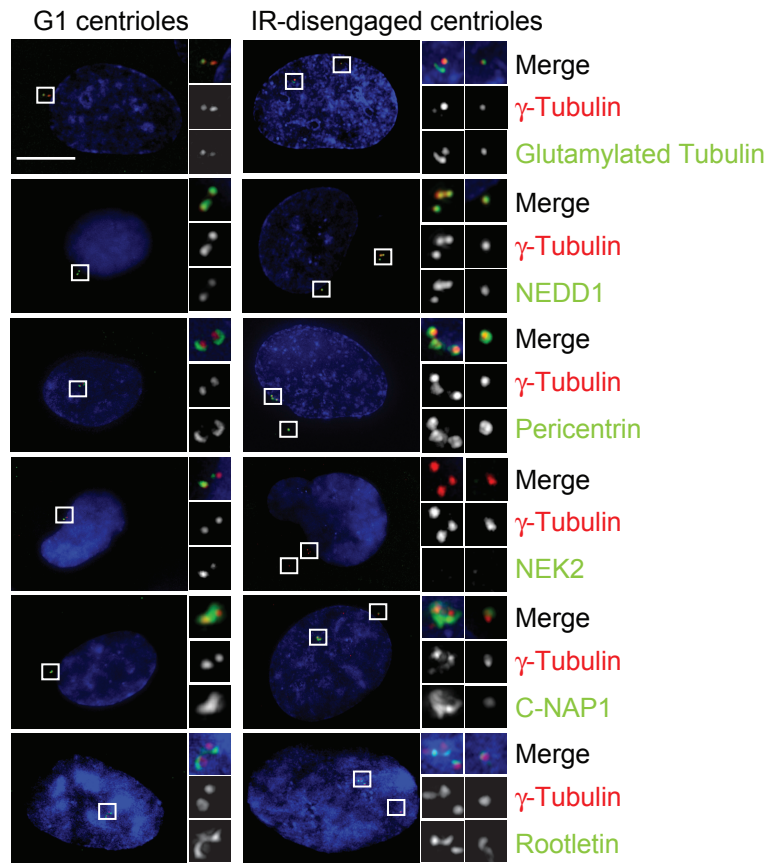

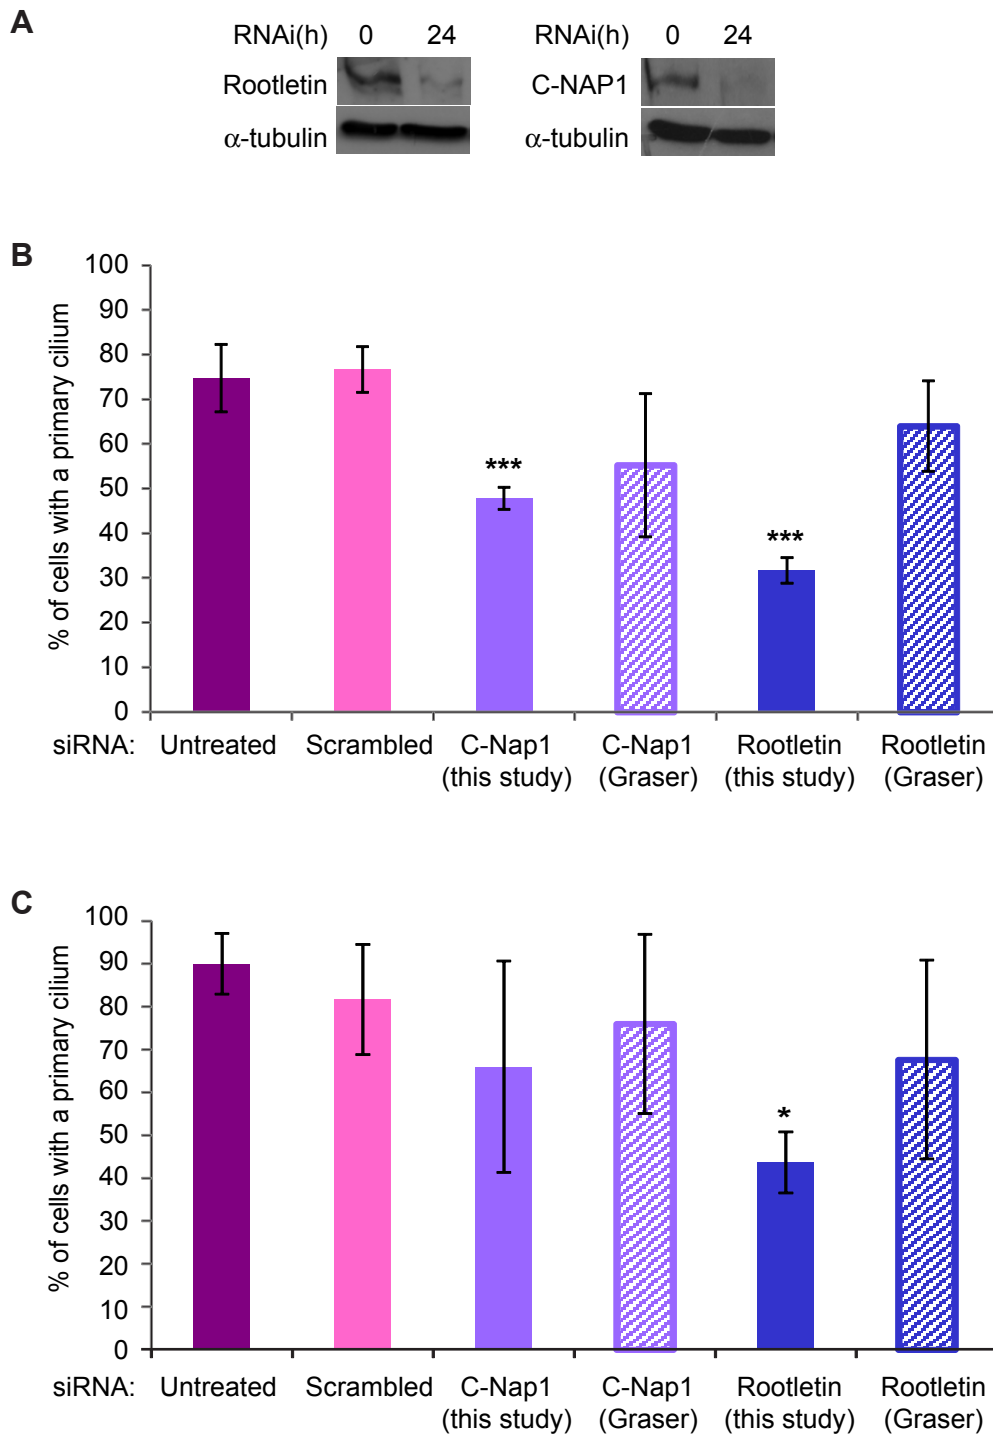

Supplement: cc-11-3769-s01.pdf [file cc-11-3769-s01.pdf]
